# Supplementary material
Source: PubMed Central journal article supplement (PMC3962746)
Supplement: NIHMS558766-supplement-01.pdf [file NIHMS558766-supplement-01.pdf]

## Appendix A. Supplemental Tables

**Supplemental Table I.** Adverse events (%) by race

| Adverse event              | Black (n = 749) | White (n = 1426) |
|----------------------------|-----------------|------------------|
| Worsening HF               | 36              | 24               |
| Myocardial infarction      | 3.7             | 3.4              |
| Unstable angina            | 7.7             | 7.4              |
| Serious adverse arrhythmia | 14              | 14               |
| Stroke                     | 3.9             | 1.9              |
| Transient ischemic attack  | 2.0             | 1.7              |
| Any of the above events    | 45              | 36               |

**Supplemental Table II.** Mode-specific event rates for death and hospitalization by race

| Event                                               | Black (n = 749) | White (n = 1426) |
|-----------------------------------------------------|-----------------|------------------|
| All-cause mortality, no. (%)                        | 134 (17.9)      | 225 (15.8)       |
| Cardiovascular mortality, no. (%)                   | 97 (13.0)       | 152 (10.7)       |
| Noncardiovascular mortality or other, no. (%)       | 37 (4.9)        | 73 (5.1)         |
| Total hospitalization, no. (%)                      | 502 (67.0)      | 886 (62.1)       |
| Cardiovascular hospitalization, no. (%)             | 422 (56.3)      | 717 (50.3)       |
| HF hospitalization, no. (%)                         | 243 (32.4)      | 300 (21.0)       |
| Noncardiovascular hospitalization or other, no. (%) | 80 (10.7)       | 169 (11.9)       |

**Supplemental Table III.** Association between black race and outcomes in chronic HF (reference = white race)

|                                                                                                        | HR (95% CI)       | P     |
|--------------------------------------------------------------------------------------------------------|-------------------|-------|
| Cardiovascular mortality                                                                               |                   |       |
| Unadjusted (n = 2296)                                                                                  | 1.18 (0.91, 1.52) | .21   |
| Adjusted for HF-ACTION model covariates* (n = 1705)                                                    | 1.25 (0.90-1.74)  | .18   |
| Adjusted for HF-ACTION model + income, employment, marital status, and education covariates (n = 1482) | 1.29 (0.90-1.86)  | .17   |
| HF hospitalization                                                                                     |                   |       |
| Unadjusted (n = 2296)                                                                                  | 1.62 (1.37-1.92)  | <.001 |
| Adjusted for HF-ACTION model covariates* (n = 1705)                                                    | 1.58 (1.27-1.96)  | <.001 |
| Adjusted for HF-ACTION model + income, employment, marital status, and education covariates (n = 1482) | 1.55 (1.22-1.97)  | <.001 |

\* Adjusted for loop diuretic dose, left ventricular ejection fraction, mitral regurgitation grade, ventricular conduction before baseline CPX, KCCQ symptom stability score, blood urea nitrogen, sex, age, peak VO<sub>2</sub> characterized by Weber class, and V<sub>E</sub>/VCO<sub>2</sub> on baseline CPX.
